# Supplementary figures and images for: SPA: A Quantitation Strategy for MS Data in Patient-derived Xenograft Models
Source: PubMed Central journal article supplement — Genomics Proteomics Bioinformatics. 2021 Feb 23;19(4):522–33. doi: 10.1016/j.gpb.2019.11.016 (PMC9040016; doi:10.1016/j.gpb.2019.11.016), 2021-02-23

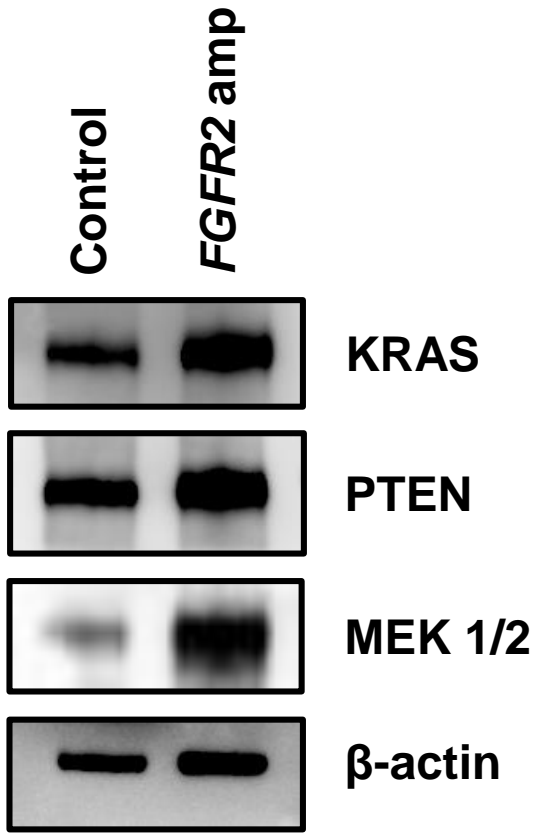

Supplement: mmc2.pdf [file mmc2.pdf]

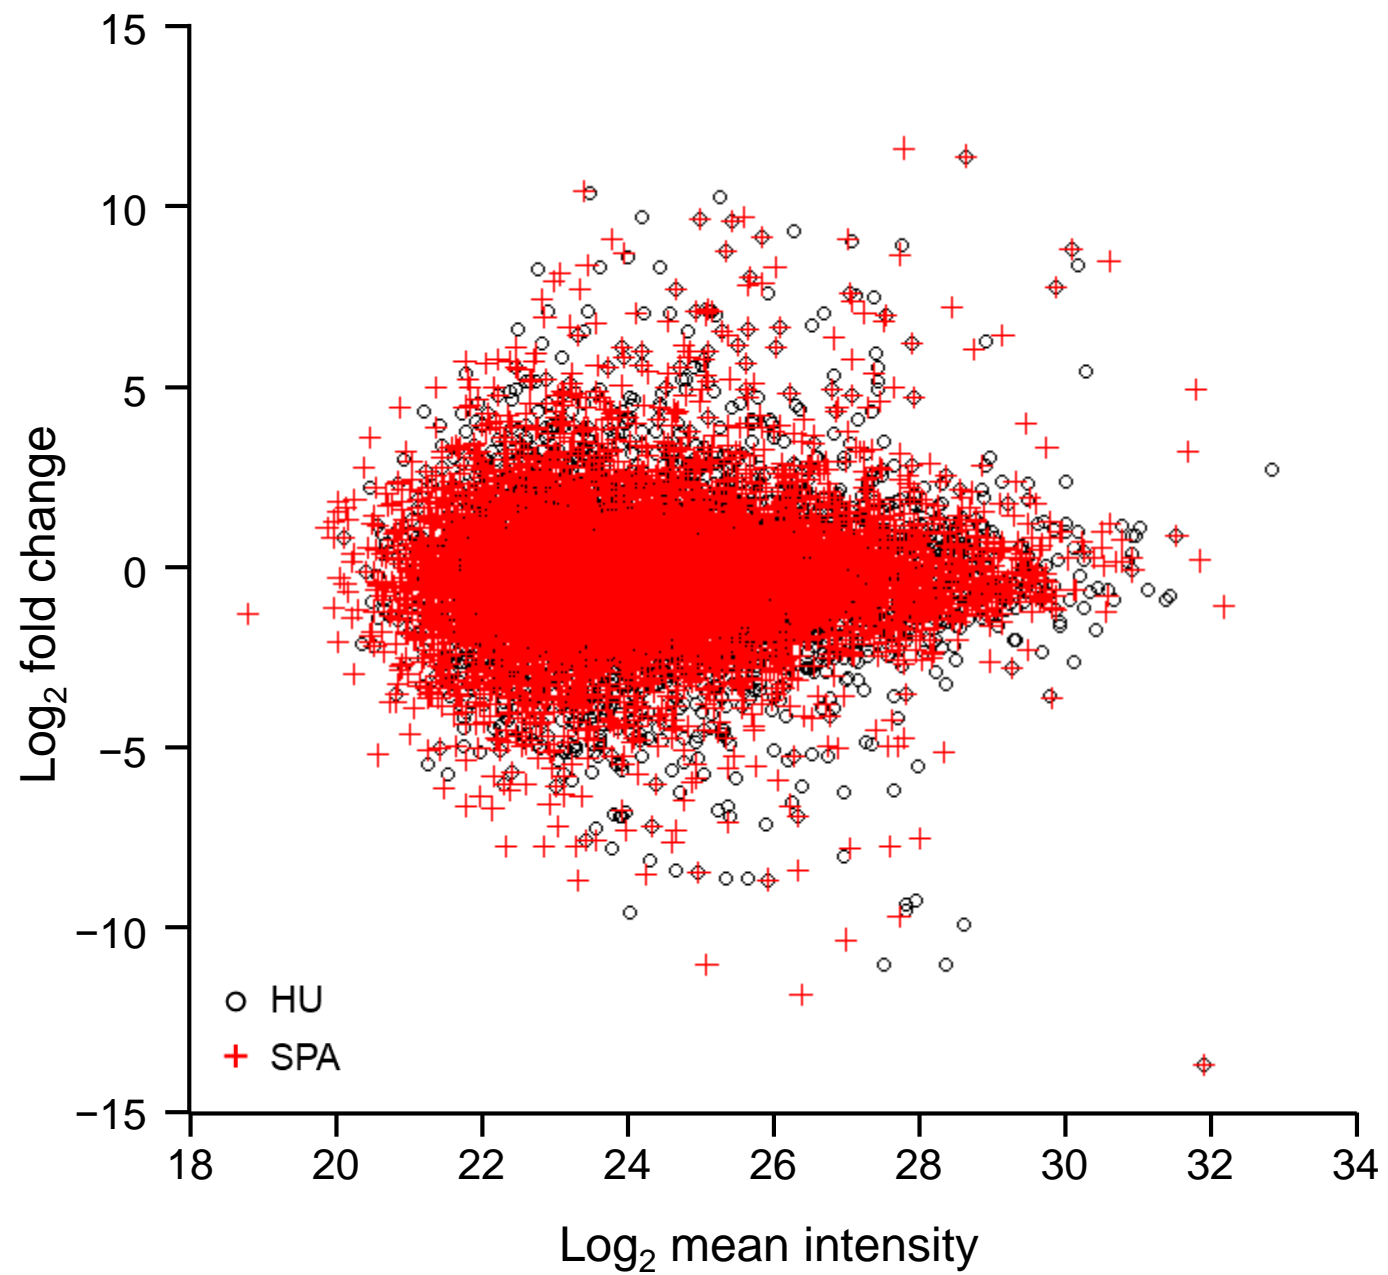

Supplement: mmc3.pdf [file mmc3.pdf]

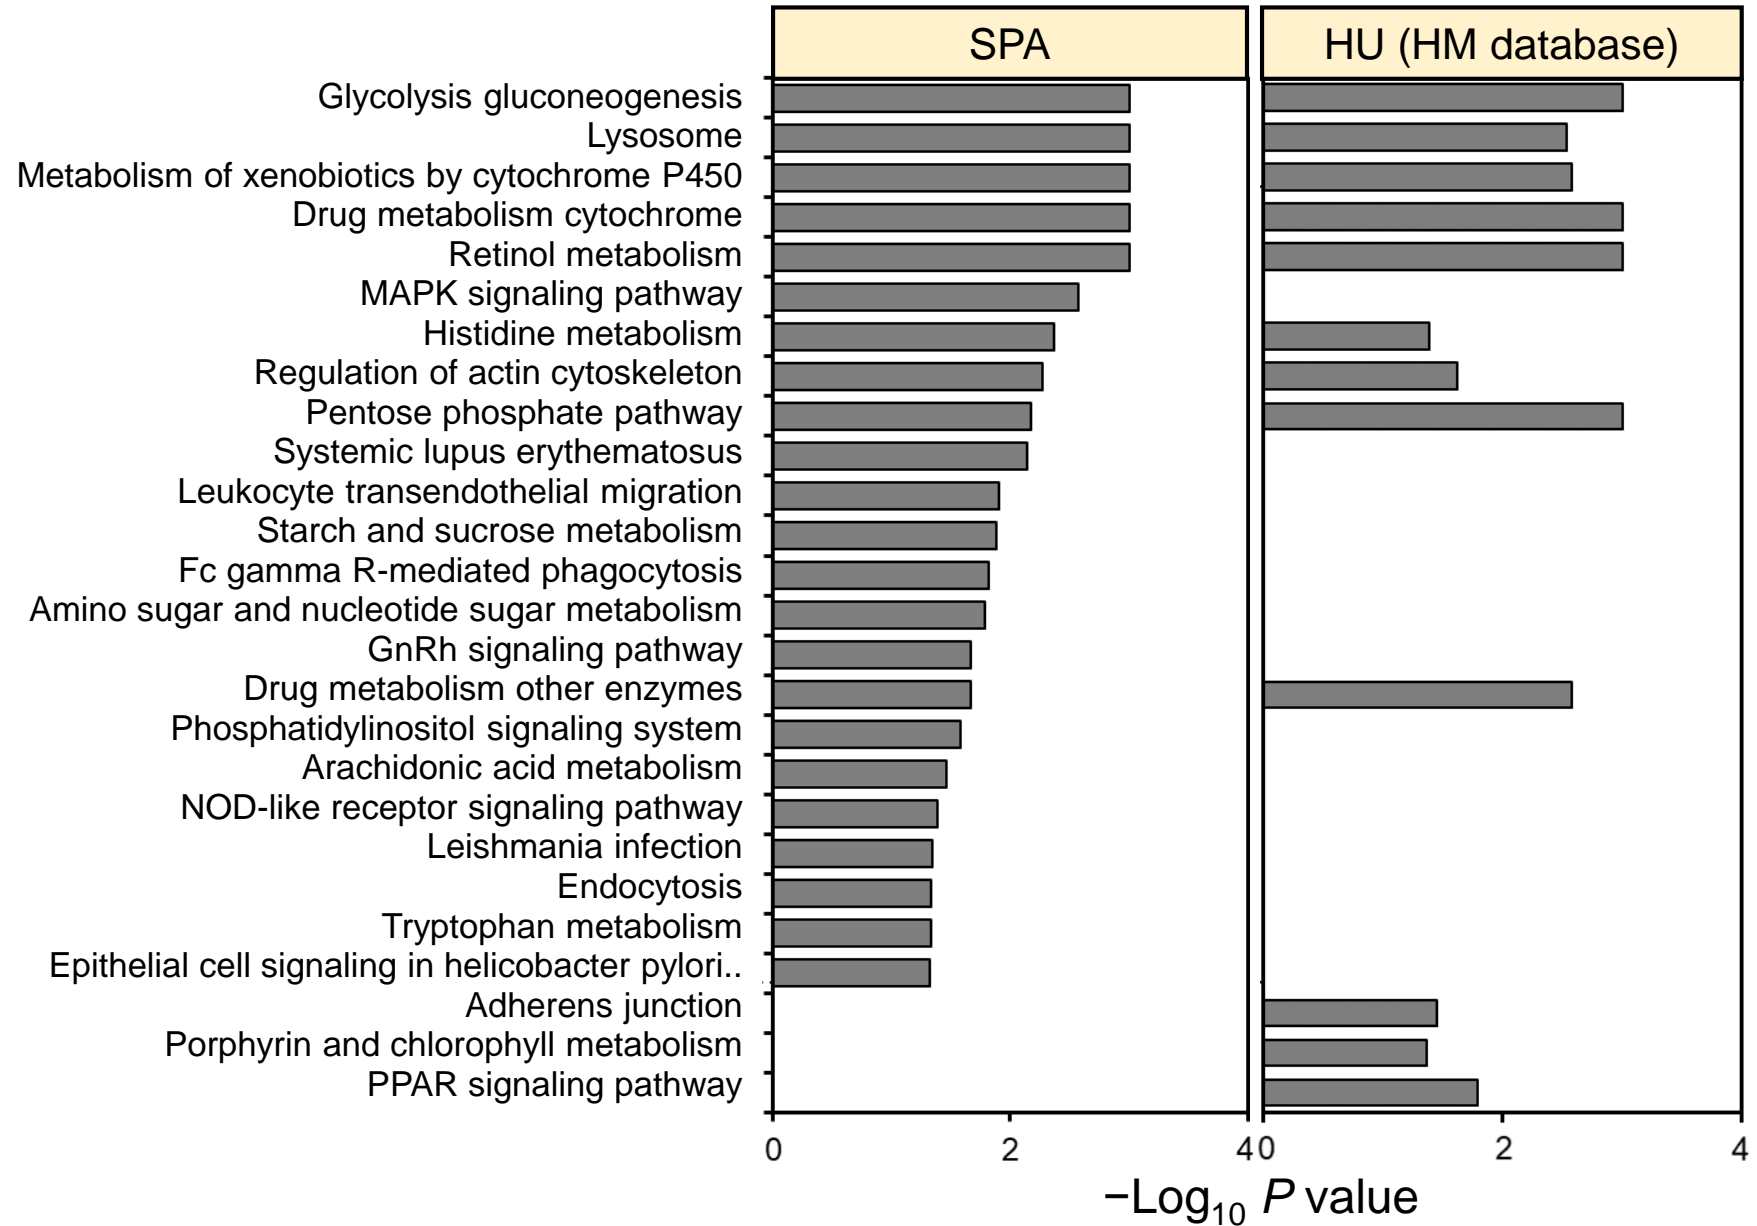

Supplement: mmc4.pdf [file mmc4.pdf]
